# Supplementary material for: Gene Co-Expression Networks Restructured Gene Fusion in Rhabdomyosarcoma Cancers
Source: PubMed Central journal article supplement (PMC6770752; doi:10.3390/genes10090665), 2019-08-30

## Supplemental Figures and Tables

---

### Supplemental Table 1.

Differential expression analysis by PCA for co-expressed modules in rhabdomyosarcoma patients with and without FOXO1-PAX3/7 fusion with full report of statistics from PERMANova

| Module | Gene Count | PC1 Variance Explained | F       | R <sup>2</sup> | P     |
|--------|------------|------------------------|---------|----------------|-------|
| 1      | 751        | 0.400                  | 0.942   | 0.017          | 0.346 |
| 2      | 615        | 0.414                  | 0.180   | 0.003          | 0.657 |
| 3      | 576        | 0.368                  | 278.645 | 0.833          | 0.001 |
| 4      | 459        | 0.451                  | 41.636  | 0.426          | 0.001 |
| 5      | 334        | 0.443                  | 92.984  | 0.624          | 0.001 |
| 6      | 201        | 0.487                  | 0.008   | 0.000          | 0.919 |
| 7      | 147        | 0.578                  | 2.310   | 0.040          | 0.143 |
| 8      | 134        | 0.670                  | 0.008   | 0.000          | 0.94  |
| 9      | 118        | 0.499                  | 36.513  | 0.395          | 0.001 |
| 10     | 84         | 0.505                  | 46.564  | 0.454          | 0.001 |
| 11     | 79         | 0.643                  | 0.014   | 0.000          | 0.91  |
| 12     | 72         | 0.505                  | 3.094   | 0.052          | 0.089 |
| 13     | 50         | 0.619                  | 0.512   | 0.009          | 0.515 |
| 14     | 35         | 0.578                  | 0.755   | 0.013          | 0.394 |
| 15     | 33         | 0.627                  | 6.840   | 0.109          | 0.005 |
| 16     | 30         | 0.593                  | 3.421   | 0.058          | 0.078 |
| 17     | 28         | 0.567                  | 0.509   | 0.009          | 0.488 |
| 18     | 24         | 0.652                  | 1.724   | 0.030          | 0.195 |
| 19     | 24         | 0.639                  | 12.214  | 0.179          | 0.001 |
| 20     | 20         | 0.821                  | 1.232   | 0.022          | 0.268 |
| 21     | 19         | 0.682                  | 3.274   | 0.055          | 0.066 |
| 22     | 18         | 0.617                  | 0.309   | 0.005          | 0.602 |
| 23     | 17         | 0.699                  | 4.702   | 0.077          | 0.038 |
| 24     | 17         | 0.640                  | 39.917  | 0.416          | 0.001 |
| 25     | 16         | 0.601                  | 2.807   | 0.048          | 0.102 |
| 26     | 16         | 0.631                  | 0.093   | 0.002          | 0.749 |
| 27     | 15         | 0.635                  | 14.414  | 0.205          | 0.001 |
| 28     | 14         | 0.628                  | 0.004   | 0.000          | 0.942 |
| 29     | 14         | 0.675                  | 0.058   | 0.001          | 0.806 |
| 30     | 13         | 0.881                  | 1.940   | 0.033          | 0.163 |
| 31     | 13         | 0.696                  | 6.383   | 0.102          | 0.017 |
| 32     | 12         | 0.885                  | 0.152   | 0.003          | 0.697 |
| 33     | 12         | 0.700                  | 1.700   | 0.029          | 0.2   |
| 34     | 12         | 0.685                  | 23.364  | 0.294          | 0.001 |
| 35     | 11         | 0.687                  | 15.395  | 0.216          | 0.001 |
| 36     | 11         | 0.710                  | 18.846  | 0.252          | 0.001 |
| 37     | 11         | 0.682                  | 0.735   | 0.013          | 0.415 |
| 38     | 10         | 0.755                  | 23.875  | 0.299          | 0.001 |
| 39     | 10         | 0.656                  | 25.448  | 0.312          | 0.001 |
| 40     | 10         | 0.659                  | 5.298   | 0.086          | 0.019 |
| 41     | 10         | 0.629                  | 4.297   | 0.071          | 0.057 |

---

Notes: PERMANOVA was performed on the distance matrix of PC1 with fusion status as the explanatory variable. Significant associations were determined by P<0.05.

---

**Supplemental Table 2**

Gene list enrichment of biological process and cytoband locations for gene co-expression modules that were differentially regulated in fusion positive versus fusion negative rhabdomyosarcoma

| Mod |         |                                          |         |         |                    |              |         |             |                    |  |
|-----|---------|------------------------------------------|---------|---------|--------------------|--------------|---------|-------------|--------------------|--|
|     | GO ID   | Name                                     | FDR     | # Match | Ratio <sup>†</sup> | Cytoband     | FDR     | Match Count | Ratio <sup>‡</sup> |  |
| 3   |         |                                          |         |         |                    | 10q26        | <0.001  | 5           | 0.22               |  |
| 4   | 6396    | RNA Processing                           | <0.0001 | 73      | 0.08               | 8q24.3       | <0.0001 | 28          | 0.22               |  |
| 5   | 9790    | Embryonic Development                    | <0.0001 | 48      | 0.04               | 11q13        | <0.0001 | 9           | 0.08               |  |
| 9   | 6890    | Vesicle Transport, Golgi to ER           | <0.0001 | 10      | 0.13               | 11q13        | <0.0001 | 11          | 0.09               |  |
| 10  | 6396    | RNA Processing                           | 0.0022  | 16      | 0.02               | 19p13.3      | <0.0001 | 11          | 0.04               |  |
| 15  | 32963   | Collagen Metabolic Process               | 0.0016  | 5       | 0.04               | 8p21.3       | 0.019   | 2           | 0.07               |  |
| 19  |         |                                          |         |         |                    | 1q24         | <0.0001 | 4           | 0.07               |  |
| 23  | 51096   | Positive Helicase Activity               | 0.0035  | 2       | 0.33               | 7p14.1       | <0.001  | 2           | 0.07               |  |
| 24  |         |                                          |         |         |                    | 3p12.1       | <0.0001 | 2           | 0.25               |  |
| 27  |         |                                          |         |         |                    | 1p36.1-p35   | 0.019   | 1           | 0.11               |  |
| 31  | 45040   | Protein Import to Mitochondrial Membrane | 0.0023  | 2       | 0.33               | 22q13.31     | 0.0012  | 2           | 0.04               |  |
| 34  |         |                                          |         |         |                    | 10q11.22     | <0.001  | 2           | 0.03               |  |
| 35  |         |                                          |         |         |                    | 1p36.1-p35   | 0.012   | 1           | 0.11               |  |
| 36  |         |                                          |         |         |                    | 19q13.2      | <0.001  | 2           | 0.08               |  |
| 38  |         |                                          |         |         |                    | 20p12.1      | <0.001  | 2           | 0.08               |  |
| 39  | 2000209 | Regulation of Anoikis                    | 0.033   | 2       | 0.08               | 20q13.3      | <0.001  | 2           | 0.1                |  |
| 40  |         |                                          |         |         |                    | 4q31.2-q32.1 | 0.0029  | 1           | 1                  |  |
| 41  |         |                                          |         |         |                    | 5q13         | <0.001  | 2           | 0.09               |  |

Notes: Ratio values represent the number of genes matched to a GO term<sup>†</sup> or cytoband<sup>‡</sup> divided by the number of genes

**Supplemental Table 3**

Expanded Co-expression Atlas results from gene list enrichment analysis with ToppFunn for 5 largest differentially regulated co-expression modules in fusion negative versus positive rhabdomyosarcoma.

| Module | Input # | ID                  | Name                                                                                                                                                              | Input # | Annotation # |
|--------|---------|---------------------|-------------------------------------------------------------------------------------------------------------------------------------------------------------------|---------|--------------|
| 3      | 576     | M2012               | Genes up-regulated in mARMS (molecular ARMS) compared to the mERMS (molecular ERMS) class of rhabdomyosarcoma tumors.                                             | 139     | 331          |
|        |         | 16849537-SuppTable2 | Human StemCell Davicioni06                                                                                                                                        | 132     | 500          |
|        |         | M7778               | Genes down-regulated in Rh4 cells (alveolar rhabdomyosarcoma, ARMS) after knockdown of the PAX3-FOXO1 [GeneID=5077;2308] fusion protein by RNAi for 72 hr.        | 27      | 48           |
|        |         | M4991               | 'PAX-FKHR signature': genes up-regulated by PAX3- or PAX7-FOXO1 [GeneID=5081;5077;2308] fusion in primary alveolar rhabdomyosarcoma(ARMS) tumors.                 | 25      | 59           |
|        |         | M12362              | Genes up-regulated in RMS cells (rhabdomyosarcoma) expressing PAX3 or PAX7 fusions with FOXO1 [GeneID=5077;5081;2308] compared to the fusion negative cell lines. | 22      | 64           |
| 4      | 475     | 15902281-TableS1a   | Human Leukemia Schoch05                                                                                                                                           | 112     | 449          |
|        |         | M4772               | Genes up-regulated in robust Cluster 2 (rC2) of hepatoblastoma samples compared to those in the robust Cluster 1 (rC1).                                           | 82      | 605          |
|        |         | M17936              | Genes within amplicon 8q23-q24 identified in a copy number alterations study of 191 breast tumor samples.                                                         | 47      | 157          |
|        |         | 19061838-TableS7    | Human Viral Cairo08                                                                                                                                               | 80      | 801          |
|        |         | M10017              | Genes down-regulated in tumor associated macrophages conditioned by: glioblastoma versus colorectal adenocarcinoma                                                | 43      | 197          |
| 5      | 326     | M8519               | Genes down-regulated in mARMS (molecular ARMS) compared to the mERMS (molecular ERMS) class of rhabdomyosarcoma tumors.                                           | 75      | 182          |
|        |         | 16849537-SuppTable2 | Human StemCell Davicioni06                                                                                                                                        | 73      | 500          |
|        |         | M19541              | Genes commonly down-regulated in human alveolar rhabdomyosarcoma (ARMS) and its mouse model overexpressing PAX3-FOXO1 [GeneID=5077;2308] fusion.                  | 50      | 408          |
|        |         | M9192               | Genes down-regulated in luminal-like breast cancer cell lines compared to the mesenchymal-like ones.                                                              | 48      | 450          |
|        |         | 20937356-TableS1    | Rat Hypothalamic Mansuy10                                                                                                                                         | 59      | 894          |
| 9      | 121     | 15902281-TableS1b   | Human Leukemia Schoch05                                                                                                                                           | 47      | 767          |
|        |         | M2105               | Genes whose expression was significantly and positively correlated with the number of perineuronal oligodendrocytes in the layer III of BA9 brain region.         | 25      | 756          |
|        |         | M1493               | Genes within amplicon 11q12-q14 identified in a copy number alterations study of 191 breast tumor samples.                                                        | 14      | 158          |
|        |         | 17683608-TableS3    | Mouse StemCell Ulloa-Montoya07                                                                                                                                    | 22      | 692          |
|        |         | M5314               | Transcripts depleted from pseudopodia of NIH/3T3 cells (fibroblast) in response to haptotactic migratory stimulus by fibronectin, FN1 [GeneID=2335].              | 21      | 668          |
| 10     | 80      |                     | FacebaseRNAseq e8.5 Hind Brain Neural Epithelium top-relative-expression-ranked 2500 k-means-cluster#2                                                            | 22      | 933          |
|        |         |                     | Sample Type by Project: Shred 1/TCGA-Bladder/Urothelial Carcinoma/Muscle invasive urothelial carcinoma/2/2                                                        | 8       | 191          |
|        |         |                     | facebase RNAseq e9.5 MaxArch 2500 K4                                                                                                                              | 17      | 1126         |
|        |         |                     | Sample Type by Project: Shred 1/TCGA-Bile Duct/Cholangiocarcinoma/Intrahepatic/4/3                                                                                | 6       | 94           |

Dev lower uro neuro e14.5 PelvicGanglion Sox10 top-relative-expression-ranked

14

904

---

Notes: All FDR & BH scores were reported as  $P < 0.05$  for results shown.

**Supplemental Table 4**

Differential expression analysis by PCA for co-expressed modules in rhabdomyosarcoma patients with FOXO1-PAX3/7 fusion. Statistics are reported for comparison between samples with PAX3 vs PAX7 fusion.

| <b>Module</b> | <b>Gene Count</b> | <b>PC1 Variance Explained</b> | <b>F</b> | <b>R<sup>2</sup></b> | <b>P</b> |
|---------------|-------------------|-------------------------------|----------|----------------------|----------|
| 1             | 2106              | 0.322                         | 1.548    | 0.048                | 0.224    |
| 2             | 1870              | 0.337                         | 0.539    | 0.017                | 0.441    |
| 3             | 905               | 0.388                         | 1.680    | 0.051                | 0.207    |
| 4             | 472               | 0.444                         | 0.138    | 0.004                | 0.709    |
| 5             | 178               | 0.499                         | 10.098   | 0.246                | 0.002    |
| 6             | 178               | 0.494                         | 0.026    | 0.001                | 0.865    |
| 7             | 148               | 0.461                         | 12.404   | 0.286                | 0.006    |
| 8             | 84                | 0.656                         | 1.807    | 0.055                | 0.204    |
| 9             | 84                | 0.493                         | 6.568    | 0.175                | 0.016    |
| 10            | 72                | 0.516                         | 17.385   | 0.359                | 0.002    |
| 11            | 62                | 0.567                         | 13.123   | 0.297                | 0.001    |
| 12            | 47                | 0.507                         | 0.875    | 0.027                | 0.341    |
| 13            | 46                | 0.540                         | 1.630    | 0.050                | 0.193    |
| 14            | 45                | 0.546                         | 0.056    | 0.002                | 0.807    |
| 15            | 37                | 0.537                         | 10.858   | 0.259                | 0.004    |
| 16            | 33                | 0.564                         | 2.104    | 0.064                | 0.152    |
| 17            | 32                | 0.570                         | 4.597    | 0.129                | 0.038    |
| 18            | 31                | 0.557                         | 2.218    | 0.067                | 0.144    |
| 19            | 27                | 0.547                         | 2.326    | 0.070                | 0.135    |
| 20            | 24                | 0.627                         | 1.529    | 0.047                | 0.229    |
| 21            | 24                | 0.600                         | 4.373    | 0.124                | 0.057    |
| 22            | 22                | 0.608                         | 0.818    | 0.026                | 0.352    |
| 23            | 20                | 0.569                         | 1.692    | 0.052                | 0.195    |
| 24            | 19                | 0.644                         | 6.007    | 0.162                | 0.03     |
| 25            | 18                | 0.649                         | 31.033   | 0.500                | 0.001    |
| 26            | 18                | 0.583                         | 7.502    | 0.195                | 0.011    |
| 27            | 17                | 0.556                         | 0.434    | 0.014                | 0.526    |
| 28            | 16                | 0.636                         | 5.974    | 0.162                | 0.015    |
| 29            | 16                | 0.641                         | 1.077    | 0.034                | 0.292    |
| 30            | 16                | 0.782                         | 0.370    | 0.012                | 0.506    |
| 31            | 16                | 0.649                         | 0.170    | 0.005                | 0.702    |
| 32            | 14                | 0.630                         | 4.262    | 0.121                | 0.054    |
| 33            | 14                | 0.656                         | 18.345   | 0.372                | 0.001    |
| 34            | 14                | 0.547                         | 0.289    | 0.009                | 0.585    |
| 35            | 14                | 0.610                         | 0.917    | 0.029                | 0.351    |
| 36            | 13                | 0.550                         | 11.948   | 0.278                | 0.001    |
| 37            | 13                | 0.668                         | 0.002    | 0.000                | 0.961    |
| 38            | 13                | 0.617                         | 3.051    | 0.090                | 0.089    |
| 39            | 12                | 0.606                         | 10.146   | 0.247                | 0.004    |
| 40            | 11                | 0.624                         | 1.056    | 0.033                | 0.316    |
| 41            | 11                | 0.693                         | 8.927    | 0.224                | 0.008    |
| 42            | 11                | 0.645                         | 0.655    | 0.021                | 0.423    |
| 43            | 11                | 0.612                         | 0.840    | 0.026                | 0.391    |
| 44            | 11                | 0.582                         | 6.277    | 0.168                | 0.022    |

|    |    |       |       |       |       |
|----|----|-------|-------|-------|-------|
| 45 | 10 | 0.692 | 0.002 | 0.000 | 0.965 |
| 46 | 10 | 0.724 | 0.007 | 0.000 | 0.935 |
| 47 | 10 | 0.649 | 4.502 | 0.127 | 0.045 |
| 48 | 10 | 0.652 | 0.589 | 0.019 | 0.445 |
| 49 | 10 | 0.660 | 2.615 | 0.078 | 0.117 |
| 50 | 10 | 0.632 | 3.922 | 0.112 | 0.05  |
| 51 | 10 | 0.629 | 1.400 | 0.043 | 0.265 |
| 52 | 10 | 0.600 | 2.889 | 0.085 | 0.099 |
| 53 | 10 | 0.593 | 2.672 | 0.079 | 0.115 |

---

Notes: PERMANOVA was performed on distance matrix of PC1 with PAX3 or PAX7 as the explanatory variable.

---

**Supplemental Table 5**

Top 5 Co-expression Atlas (ToppFunn) results from gene list enrichment for genes that were differentially co-expressed *PAX3* versus *PAX7* fusion positive rhabdomyosarcoma.

| <b>ID</b>           | <b>Name</b>                                                                                                                    | <b>Input #</b> | <b>Annotation #</b> |
|---------------------|--------------------------------------------------------------------------------------------------------------------------------|----------------|---------------------|
| M2012               | Genes up-regulated in alveolar rhabdomyosarcoma compared to embryonic rhabdomyosarcoma                                         | 34             | 331                 |
| 16849537-SuppTable2 | Human StemCell Davicioni06                                                                                                     | 33             | 500                 |
| 18757322-TableS3    | Human Breast Creighton584                                                                                                      | 30             | 480                 |
| M4680               | Genes up-regulated in RD cells (embryonal rhabdomyosarcoma) by expression of PAX3- or PAX7-FOXO1 fusions of retroviral factors | 18             | 225                 |
| 16849537-SuppTable3 | Human StemCell Davicioni389                                                                                                    | 20             | 319                 |

**Supplemental Figure 1**

The distribution of max gene expression values per probe (A) and within gene expression variance (B) of raw data from GSE 66533. Prior to data analysis, the 33% least variant genes were removed. The subsequent distribution of max gene expression values per probe (C) and remaining gene expression variance (D) for network analysis.

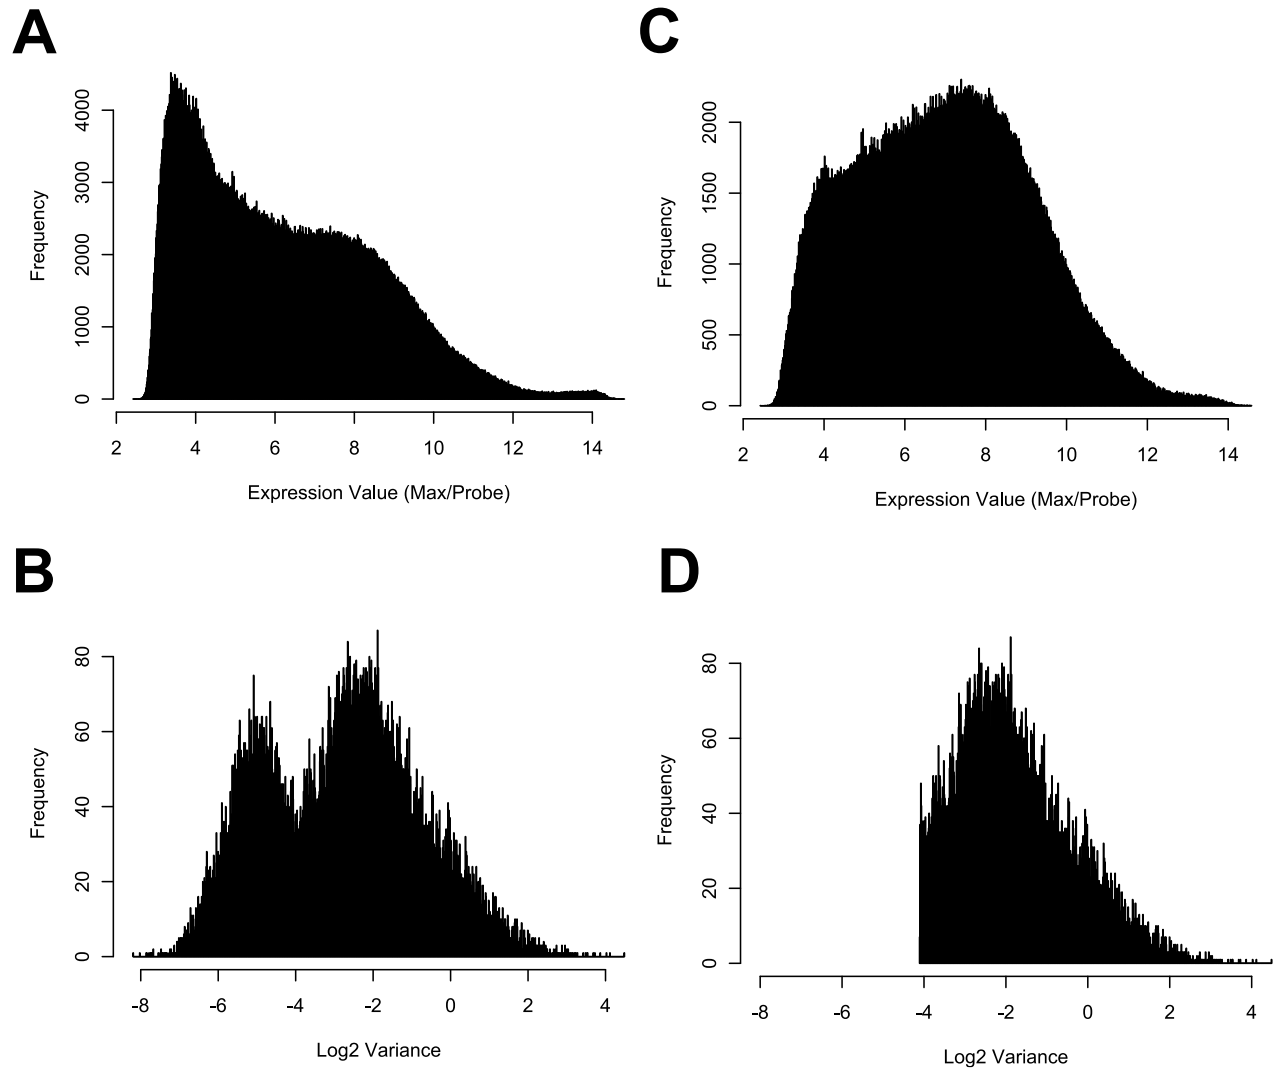



**Supplemental Figure 2.**

Heatmap plots of normalized gene expression values for 41 co-expression modules that were identified using lmQCM network analysis. In all plots, fusion negative samples were plotted as the leftmost 25 columns, while fusion positive samples were plotted as the rightmost 33 columns. A. Examples of co-expression modules that did not vary with respect to fusion status (A, module 1, top), that were upregulated in fusion positive samples (A, Module 3, middle), or that were downregulated in fusion positive samples (A, module 4, bottom). B. Heatmap plots of remaining co-expression modules.

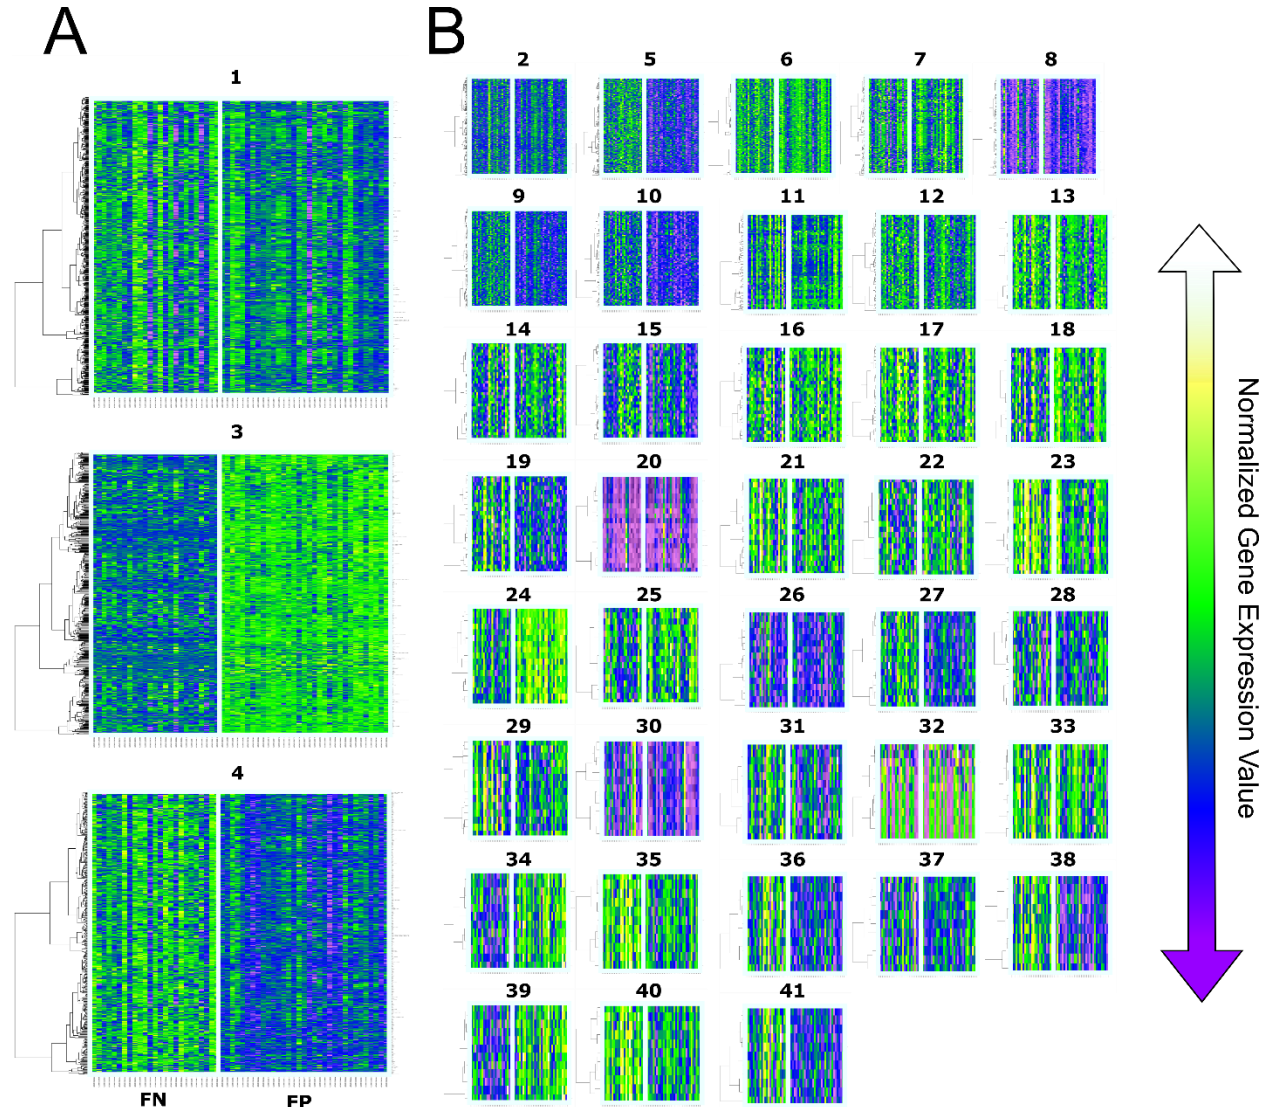

Supplement: genes-10-00665-s001.pdf [file genes-10-00665-s001.pdf]
